# Supplementary material
Source: publisher figshare collection journal article supplement (https://frontiersin.figshare.com/ndownloader/files/13169357)
Supplement: Supplementary file [file 13169357]

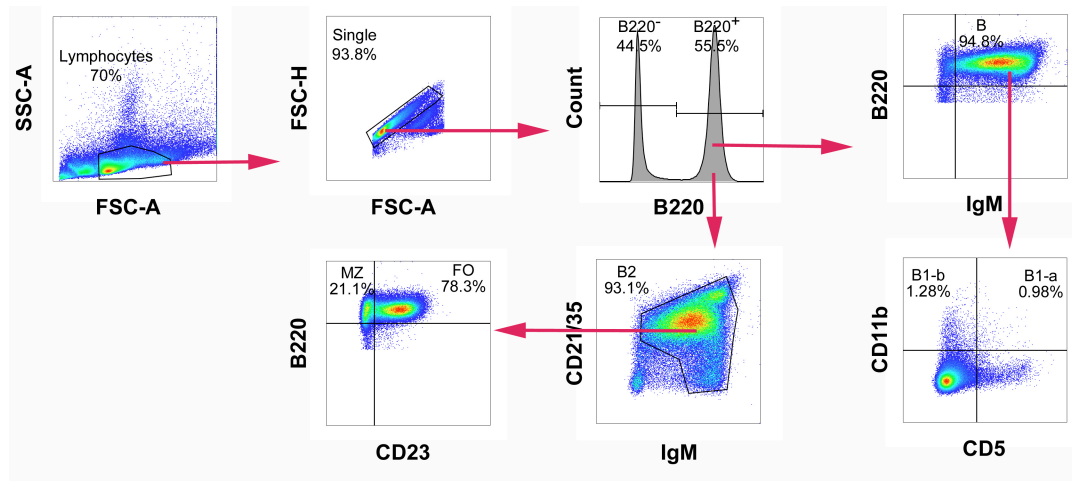

**Supplementary Figure 4: Gating strategy of B cell subtype selection by flow cytometry.**

Upper pannels : selection of single leucocytes based on their size (FSC-A and SSC-A), single cells based on FSC-A and FSC-H, and selection of total B cells based on the expression of B220 and IgM markers.

Lower pannels : we used CD21/35 to select B2 cells and used CD23 to discriminate the MZ and FO cells. MZ cells are (B220<sup>+</sup>IgM<sup>+</sup>CD21/35<sup>high</sup>CD23<sup>-</sup>), FO cells are (B220<sup>+</sup>IgM<sup>+</sup>CD21/35<sup>low</sup>CD23<sup>+</sup>). From B (B220<sup>+</sup>IgM<sup>+</sup>) cells, CD5 discriminates B1-A and B1-b : B1-a cells are CD5<sup>+</sup>, B1-b cells are CD5<sup>-</sup>.
